# Mechanical cell competition in heterogeneous epithelial tissues

\*R. J. Murphy<sup>1</sup>, P. R. Buenzli<sup>1</sup>, R. E. Baker<sup>2</sup> and M. J. Simpson<sup>1</sup>

<sup>1</sup> *Mathematical Sciences, Queensland University of Technology, Brisbane, Australia*

<sup>2</sup> *Mathematical Institute, University of Oxford, Oxford, UK*

## Abstract

Mechanical cell competition is important during tissue development, cancer invasion, and tissue ageing. Heterogeneity plays a key role in practical applications since cancer cells can have different cell stiffness and different proliferation rates than normal cells. To study this phenomenon, we propose a one-dimensional mechanical model of heterogeneous epithelial tissue dynamics that includes cell-length-dependent proliferation and death mechanisms. Proliferation and death are incorporated into the discrete model stochastically and arise as source/sink terms in the corresponding continuum model that we derive. Using the discrete model and the new continuum description, we explore several applications including the evolution of homogeneous tissues experiencing proliferation and death, and competition in a heterogeneous setting with a cancerous tissue competing for space with an adjacent normal tissue. This framework allows us to postulate new mechanisms that explain the ability of cancer cells to outcompete healthy cells through mechanical differences rather than by having some intrinsic proliferative advantage.

*Key words: discrete, individual-based, cell-based, continuum-limit, coarse-graining, cell migration, cell proliferation, cell death.*

## 1 Introduction

In cell biology, epithelial tissues are continuously experiencing forces and replacing cells, through cell proliferation and death, to maintain homeostasis. These tissues can be naturally heterogeneous or heterogeneous due to cancer development and progression [14, 36]. This heterogeneity is observed at multiple scales, from sub-cellular to cellular to the tissue scale [44], and can result in cell competition. Cell competition can act as a quality control mechanism in tissue development or as a defence against precancerous cells, and harnessing cell competition has been suggested as a possible approach to enhance both cell-based cancer and regenerative therapies [37]. Therefore, gaining a greater understanding of the mechanisms underlying cell competition is very desirable. In mathematical models of cell competition the classical hypothesis is that cells compete due to differences in their intrinsic proliferation rates. However, this may not be true and mathematical models have begun to explore different mechanisms [19, 48]. We will explore mechanical cell competition.

---

\*Corresponding author: ryanjohn.murphy@hdr.qut.edu.au

In the emerging field of mechanical cell competition, *winner* cells compress neighbouring cells promoting tissue crowding and regions of higher density, which leads to cell death [5, 21, 47], while cell proliferation occurs in regions of lower density [13]. In this work, we focus on mechanical cell competition arising from the coupling of a cell-based model of epithelial tissue mechanics with cell-length-dependent proliferation and death mechanisms. We consider mechanical forces to be driven by cell stiffness which is important for cancer progression [41], cancer detection [36], morphogenesis [10], and wound healing [9]. A grand challenge in cell biology is to understand how tissue-level outcomes are related to cell-based mechanisms, especially when experiments are performed by focusing on a single scale, and many cellular processes occur over multiple overlapping timescales [6, 48]. Therefore, we apply mathematical modelling with *in silico* simulations to develop a framework to quantitatively connect cell-level mechanisms with tissue-level outcomes.

Many mathematical modelling frameworks, including both discrete models and continuum models, have been used to study cell migration and cell proliferation. In discrete models individual cell properties and inter-cellular interactions can be prescribed [33, 34]. However, discrete models often lack macroscopic intuition and can be computationally intensive, especially with proliferation and death included, which are commonly stochastic and require many realizations to understand the average behaviour. Continuum models commonly include proliferation and death through source/sink terms and may require constitutive equations to close the system [3, 21, 25, 39, 43]. In general, continuum models do not make the underlying cell-level processes clear [12]. However, continuum models can be less computationally expensive than discrete models and can be analysed with well-established mathematical techniques such as stability analysis [1] and phase plane analysis [18].

We are most interested in models that connect the discrete and continuum scales [4, 11, 26, 32, 35, 46, 49] because this allows us to switch between the two spatial scales and take advantage of both. To do so, we focus on a mechanical model and extend the works of Murray et al. [28, 29, 30, 31], Lorenzi et al. [23], Baker et al. [2], and Murphy et al. [27] to a new model for fully heterogeneous populations which experience both proliferation and death. This framework allows us to explore mechanical cell competition, which was not previously possible.

This work is structured as follows. In Section 2, we present a new discrete mechanical model that includes cell-length-dependent proliferation and death mechanisms. We then derive the corresponding novel continuum model that takes the form of a system of coupled nonlinear partial differential equations with both hyperbolic and parabolic properties. In Section 3.1, we explore our novel model by considering the evolution of a homogeneous tissue where cells are undergoing both proliferation and death. In Section 3.2, we explore mechanical cell competition in the context of cancer invasion by heterogeneous tissue composed of both cancerous and normal cells that compete for space. Using the model we explore whether cancer cells will eventually replace all of the healthy cells or can the cancer cells coexist with the healthy cells?

## 2 Model formulation

In this section, we focus on how we stochastically implement cell proliferation and death for heterogeneous cell populations within the discrete mechanical framework and the derivation of the continuum description.

### 2.1 Discrete model

We start by describing the mechanical model and then include proliferation and death. We represent the epithelial tissue as a one-dimensional chain of cells, connected at cell boundaries, in a fixed domain of length  $L$ . The cells experience cell-cell interaction forces at their cell boundaries, for example cell-cell adhesion [17] or compressive stresses [24]. For a system of  $N$  cells, cell  $i$  has left and right cell boundaries at positions  $x_i^N(t)$ ,  $x_{i+1}^N(t)$ , respectively. Fixed boundary conditions at  $x = 0$  and  $x = L$  are imposed  $x_1^N(t) = 0$  and  $x_{N+1}^N(t) = L$ . To allow for heterogeneous tissues, each cell  $i$ , which can be thought of here as a mechanical spring, is prescribed with intrinsic cell properties including a cell stiffness,  $k_i^N$ , and resting cell length,  $a_i^N$  (Figure 1a). Assuming cell motion occurs in an overdamped environment, the evolution of cell boundary  $i$  in a system of  $N$  cells is

$$\eta \frac{dx_i^N(t)}{dt} = f_i^N(l_i^N(t)) - f_{i-1}^N(l_{i-1}^N(t)), \quad i = 2, \dots, N, \quad (1)$$

where  $\eta > 0$  is the viscosity coefficient and  $f_i^N(l_i^N(t))$  is the cell-cell interaction force [27]. This cell-cell interaction force law may be given by, for example, a cubic, Hertz, Lennard-Jones, or Johnson-Kendall-Roberts law [2, 23, 29]. However, for simplicity, we choose a Hookean force law,

$$f_i^N(l_i^N(t)) = k_i^N [l_i^N(t) - a_i^N], \quad (2)$$

where cell  $i$  has length  $l_i^N(t) = x_{i+1}^N(t) - x_i^N(t) > 0$ .

We include cell proliferation stochastically, by considering that cell  $i$  proliferates with probability  $P(l_i^N(t))dt$  in the small time interval  $[t, t + dt)$ , that depends on the current cell length,  $l_i^N(t)$ , and proliferation mechanism  $P(\cdot)$  [2, 38]. When cell  $i$  proliferates we increase the number of cells by one by introducing a new cell boundary,  $x_{i+1}^{N+1}$ , at the midpoint of the original cell,  $x_{i+1}^{N+1} = (x_i^N + x_{i+1}^N)/2$ , and relabel indices accordingly (Figure 1a). Daughter cells take the same intrinsic cell properties as the parent cell. Cell death is included similarly to cell proliferation with a cell-length-dependent death mechanism,  $D(l_i^N(t))$ . In a system of  $N + 1$  cells, when cell  $i$  dies, with cell boundaries  $x_i^{N+1}$  and  $x_{i+1}^{N+1}$ , the number of cells is reduced by one. The two cell boundaries are set to instantly coalesce at the midpoint of the dying cell (Figure 1b). Cell death at the tissue boundaries needs to be considered separately (Supplementary Material S1.2). In this work, we consider constant, linear, and logistic models of proliferation and death (Table 1, Figure 2). We solve discrete Equations (1) together with a stochastic implementation of proliferation and death numerically (Supplementary Material S2.1).

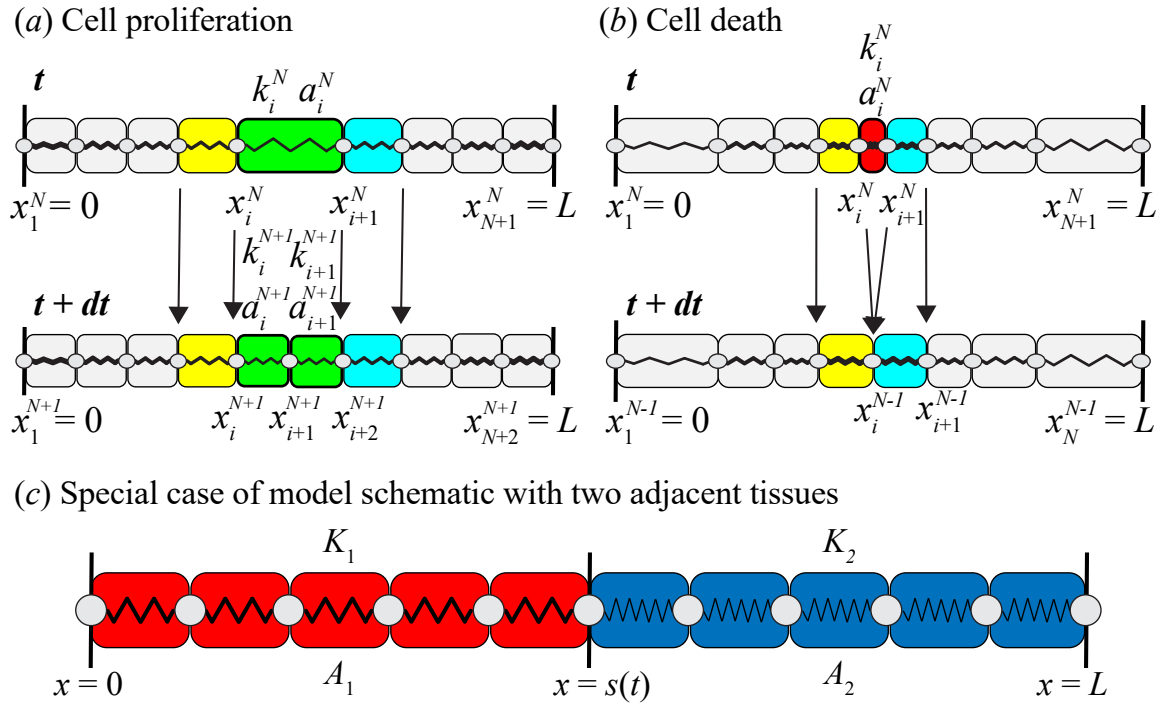

Figure 1: Discrete model schematic for a heterogeneous epithelial tissue with cell proliferation and death. Cell  $i$  in a system of  $N$  cells has left and right cell boundaries  $x_i^N(t), x_{i+1}^N(t)$ , with  $x_i^N(t) < x_{i+1}^N(t)$ , respectively, and is prescribed with a cell stiffness  $k_i^N > 0$ , and a resting cell length  $a_i^N \geq 0$ . (a) Cell proliferation. Cell  $i$ , coloured green, is selected to proliferate at time  $t$ . At time  $t + dt$ , the cell has proliferated with a new cell boundary introduced at the midpoint of the original cell. Cell properties of the daughter cell are prescribed from the parent cell. (b) Cell death. Cell  $i$ , coloured red, is selected to die at time  $t$ . At time  $t + dt$ , the cell is removed and the cell boundaries of cell  $i$  at time  $t$  have coalesced at midpoint of the original cell. For both proliferation and death cells are re-indexed at time  $t + dt$ . (c) Special case with two adjacent tissues. The left tissue (tissue 1) is coloured red and the right tissue (tissue 2) is coloured blue. The interface position between the left and right tissues is  $x = s(t)$ . Each cell in tissue  $i$  has cell stiffness  $K_i$  and resting cell length  $A_i$ . Proliferation and death rates remain dependent on the length of each cell. This could also represent a single tissue with internal heterogeneity.

Table 1: Proliferation and death mechanisms written in terms of cell length,  $l_i^N$ , proliferation parameter,  $\beta$ , and death parameters,  $\gamma, l_d$ .

|            | Constant | Linear                                                                                       | Logistic               |
|------------|----------|----------------------------------------------------------------------------------------------|------------------------|
| $P(l_i^N)$ | $\beta$  | $\beta l_i^N$                                                                                | $\beta$                |
| $D(l_i^N)$ | $\gamma$ | $\begin{cases} \gamma(l_d - l_i^N), & 0 \leq l_i^N \leq l_d \\ 0, & l_d < l_i^N \end{cases}$ | $\frac{\gamma}{l_i^N}$ |

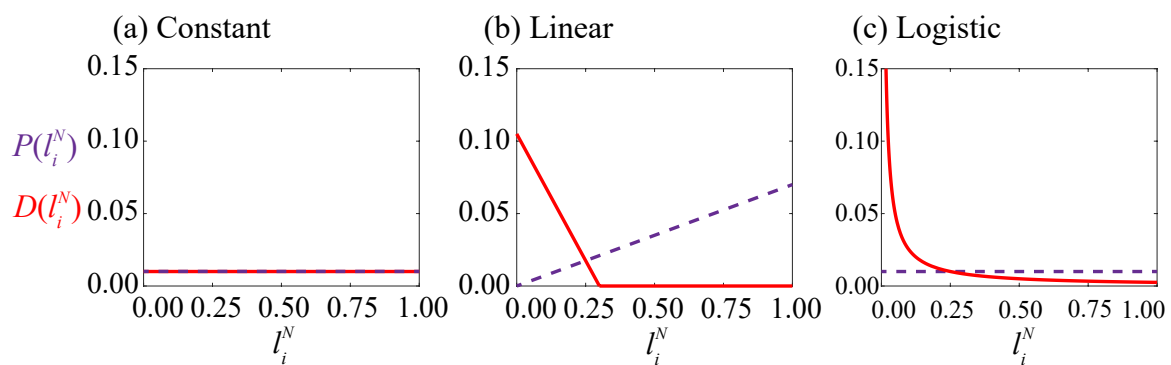

Figure 2: Proliferation and death mechanisms considered in this work. Proliferation rates,  $P(l_i^N)$  (dashed), and death rates,  $D(l_i^N)$  (solid), shown as a function of cell length,  $l_i^N$ . Parameters used in this work: (a)  $\beta = 0.01, \gamma = 0.01$ , (b)  $\beta = 0.07, \gamma = 0.35, l_d = 0.3$ , (c)  $\beta = 0.01, \gamma = 0.0025$ .

## 2.2 Derivation of continuum model

To understand the mean behaviour of the discrete model we must average over many identically prepared stochastic realizations. However, this can be computationally intensive, especially for large  $N$ . The corresponding continuum model, which we first present and then derive, represents the average behaviour and unlike the discrete model the computational time required to solve the continuum model is independent of  $N$ .

The continuum model for the evolution of the cell density,  $q(x, t)$ , in terms of the continuous cell-cell interaction force,  $f(x, t)$ , proliferation rate,  $P(1/q(x, t))$ , and death rate,  $D(1/q(x, t))$ , is

$$\frac{\partial q(x, t)}{\partial t} = \underbrace{-\frac{1}{\eta} \frac{\partial^2 f(x, t)}{\partial x^2}}_{\text{mechanical relaxation}} + \underbrace{q(x, t) P\left(\frac{1}{q(x, t)}\right)}_{\text{proliferation}} - \underbrace{q(x, t) D\left(\frac{1}{q(x, t)}\right)}_{\text{death}}, \quad (3)$$

where the continuous cell-cell interaction force which corresponds to Equation (2) is given by

$$f(x, t) = k(x, t) \left( \frac{1}{q(x, t)} - a(x, t) \right), \quad (4)$$

with cell stiffness,  $k(x, t)$ , and the resting cell length,  $a(x, t)$ , also being described by continuous fields. These intrinsic mechanical cell properties are constant for each cell and transported by the motion of cells. The proliferation and death functions,  $P(\cdot)$  and  $D(\cdot)$ , respectively, (Table 1) are evaluated at  $1/q(x, t)$ . Depending on the choice of proliferation and death mechanisms we may have additional intrinsic cellular properties,  $\beta(x, t)$ ,  $\gamma(x, t)$ , and  $l_d(x, t)$ . All intrinsic cellular properties which are constant are governed by transport equations of the form

$$\frac{\partial \chi(x, t)}{\partial t} + u(x, t) \frac{\partial \chi(x, t)}{\partial x} = 0, \quad \chi = k, a, \beta, \gamma, l_d, \quad (5)$$

where  $u(x, t)$  is the cell velocity, related to the cell density and gradient of the cell-cell interaction force through

$$u(x, t) = \frac{1}{\eta q(x, t)} \frac{\partial f(x, t)}{\partial x}. \quad (6)$$

From Equation (6), the cell density flux,  $j(x, t) = q(x, t)u(x, t)$ , is equal to the spatial gradient of the cell-cell interaction force,  $(1/\eta)\partial f/\partial x$ . We solve the system of Equations (3)-(6) together with initial conditions and boundary conditions numerically (Supplementary Material S2.2).

We now systematically derive Equation (3). We take care to explicitly state and make clear all approximations made in this derivation. We incorporate proliferation and then death into the modelling framework, under the assumption that the two processes are independent. The previously derived mechanical relaxation term and transport of cellular property equations (5) are briefly discussed [27]. For clarity, the derivation is shown for one spring per cell. However, this analysis can be extended to  $m > 1$  springs per cell which, for sufficiently small  $N$ , is a more appropriate method to define the continuous field functions [27] (Supplementary Material S1.1).

### 2.2.1 Proliferation

As cell proliferation is included stochastically (Sections 2.1, S2.1), we consider an infinitesimal time interval  $[t, t + dt)$  and condition on the possible proliferation events that could occur and influence the position of cell boundary  $i$  in a system of  $N$  cells. Choosing  $dt$  sufficiently small so that at most one proliferation event can occur in  $[t, t + dt)$ , there are four possibilities: i) there is no proliferation, in which case the cell boundary position  $x_i^N$  only changes by mechanical relaxation; ii) there is proliferation to the right of cell  $i - 1$ ; iii) there is proliferation to the left of cell  $i - 1$ ; and iv) cell  $i - 1$  proliferates. This leads to the following infinitesimal evolution law for the position of cell boundary  $x_i^N$ , accounting for cell relabelling when a new cell is added:

$$\begin{aligned} x_i^N(t + dt) = & \left[ x_i^N(t) + \frac{dt}{\eta} \{ f^N(l_i^N) - f^N(l_{i-1}^N) \} \right] \times \mathbb{1} \{ \text{no proliferation} \} \\ & + \left[ x_i^{N-1}(t) + \frac{dt}{\eta} \{ f^{N-1}(l_i^{N-1}) - f^{N-1}(l_{i-1}^{N-1}) \} \right] \\ & \quad \times \mathbb{1} \{ \text{proliferation right of cell } i - 1 \} \\ & + \left[ x_{i-1}^{N-1}(t) + \frac{dt}{\eta} \{ f^{N-1}(l_{i-1}^{N-1}) - f^N(l_{i-2}^{N-1}) \} \right] \\ & \quad \times \mathbb{1} \{ \text{proliferation left of cell } i - 1 \} \\ & + \left[ \frac{x_i^{N-1}(t) + x_{i-1}^{N-1}(t)}{2} + \frac{dt}{2\eta} \{ f^{N-1}(l_i^{N-1}) - f^N(l_{i-2}^{N-1}) \} \right] \\ & \quad \times \mathbb{1} \{ \text{proliferation of cell } i - 1 \}. \end{aligned} \quad (7)$$

Each term in square brackets is the resulting force from neighbouring cells due to mechanical relaxation, given by Equations (1), for each potential event. In addition, we include Boolean random variables expressed as indicator functions,  $\mathbb{1} \{ \cdot \}$ , defined as

$$\mathbb{1} \{ \text{event} \} = \begin{cases} 1, & \text{if event occurs in } [t, t + dt), \\ 0, & \text{otherwise,} \end{cases} \quad (8)$$

whose expectations in the context of Equation (7) can be interpreted as proliferation probabilities. For a system of  $N$  cells, where  $dt$  is sufficiently small, these proliferation probabilities are given by

$$\mathbb{P}(\text{no proliferation in } [t, t + dt)) = 1 - dt \sum_{j=1}^N P(l_j^N), \quad (9a)$$

$$\mathbb{P}(\text{proliferation to the right of cell } i - 1 \text{ in } [t, t + dt)) = dt \sum_{j=i}^N P(l_j^N), \quad (9b)$$

$$\mathbb{P}(\text{proliferation to the left of cell } i - 1 \text{ in } [t, t + dt)) = dt \sum_{j=1}^{i-2} P(l_j^N), \quad (9c)$$

$$\mathbb{P}(\text{proliferation of cell } i - 1 \text{ in } [t, t + dt)) = dt P(l_{i-1}^N). \quad (9d)$$

Taking a statistical expectation, denoted  $\langle \cdot \rangle$ , of Equation (7),  $\langle x_i^N(t) \rangle$  now represents the expected position of cell boundary  $i$  at time  $t$  in a system of  $N$  cells. We use the proliferation probabilities

with the following simplifying assumptions: i)  $\langle x_i^N(t) \mathbb{1}\{\text{event}\} \rangle = \langle x_i^N(t) \rangle \langle \mathbb{1}\{\text{event}\} \rangle$ , namely independence of the position of the cell boundary in space and proliferation propensity, and a mean-field approximation as proliferation propensities depend on cell length; ii)  $\langle f(l_i^N(t)) \mathbb{1}\{\text{event}\} \rangle = \langle f(l_i^N(t)) \rangle \langle \mathbb{1}\{\text{event}\} \rangle$ , namely independence of the force and the propensity to proliferate, and a mean-field approximation as force depends on cell length; iii) a statistical mean-field approximation for force,  $\langle f^N(l_j^N) \rangle = f^N(\langle l_j^N \rangle)$ , and proliferation propensities,  $\langle P(l_j^N) \rangle = P(\langle l_j^N \rangle)$ . For simplicity we now drop the  $\langle \cdot \rangle$  notation. Then,

$$\begin{aligned} \frac{x_i^N(t+dt) - x_i^N(t)}{dt} &= \frac{1}{\eta} [f^N(l_i^N) - f^N(l_{i-1}^N)] \\ &- x_i^N(t) \sum_{j=1}^N P(l_j^N) + x_i^{N-1}(t) \sum_{j=i}^{N-1} P(l_j^{N-1}) \\ &+ x_{i-1}^{N-1}(t) \sum_{j=1}^{i-2} P(l_j^{N-1}) + \left( \frac{x_i^{N-1}(t) + x_{i-1}^{N-1}(t)}{2} \right) P(l_{i-1}^{N-1}) + \mathcal{O}(dt). \end{aligned} \quad (10)$$

We also assume: iv) the total propensity to proliferate is not significantly changed due to single a proliferation event,  $\sum_{j=1}^{N-1} P(l_j^{N-1}) dt = \sum_{j=1}^N P(l_j^N) dt + \mathcal{O}(dt^2, N^{-1})$ ; v) a single proliferation event does not significantly alter the position of a cell boundary,  $x_i^{N-1} = x_i^N + \mathcal{O}(dt)$  (Figure 1). As we will show, assumptions iv) and v) are good approximations for large  $N$  and allow us to combine summations. Then, assuming vi)  $\langle x_i^N(t) \rangle$  is a continuous function of time, we rearrange and take the limit  $dt \rightarrow 0$ . For the proliferation terms we replace the cell length with the discrete cell density  $q_i^N = 1/l_i^N$  to obtain

$$\begin{aligned} \frac{dx_i^N}{dt} &= \frac{1}{\eta} [f^N(l_i^N) - f^N(l_{i-1}^N)] \\ &- \left( \frac{1}{q_i^N(t)} \right) \left[ \sum_{j=1}^{i-2} P\left( \frac{1}{q_{j+1}^N(t)} \right) + \frac{1}{2} P\left( \frac{1}{q_i^N(t)} \right) \right]. \end{aligned} \quad (11)$$

Equation (11) is only valid for the time interval  $[t, t+dt)$  under the assumptions iv) and v) above.

Thus far, we have extended the discrete model with mechanical relaxation to include the effects of cell proliferation. However, the statistically averaged model still retains information about discrete cell entities. We thus average over space to define a continuum cell density. Following Murphy et al. [27], we introduce the microscopic density of cells,

$$\hat{q}(x, t) = \sum_{i=1}^N \delta(x - x_i^N(t)), \quad (12)$$

where  $\delta$  is the Dirac delta function [8, 22]. We define a local spatial average over a length scale  $\delta x$ , denoted  $\langle \cdot \rangle_{\delta x}$ , such that  $a_i \ll \delta x \ll L$ , which is sufficiently large to capture local heterogeneities for cellular properties that are constant during cell motion, including  $k$  and  $a$ , but sufficiently small to define continuous properties across  $L$ . The continuous cell density function,  $q(x, t)$ , is thus defined as

$$q(x, t) = \langle \hat{q}(x, t) \rangle_{\delta x} = \frac{1}{2\delta x} \int_{x-\delta x}^{x+\delta x} \hat{q}(y, t) dy. \quad (13)$$

Differentiating Equation (13) with respect to time gives

$$\frac{\partial q(x, t)}{\partial t} = -\frac{\partial}{\partial x} \left\langle \sum_{i=1}^N \delta(x - x_i^N(t)) \frac{dx_i^N}{dt} \right\rangle_{\delta x}, \quad (14)$$

where we use properties of the Dirac delta distribution [22] and interchange the derivative with the spatial average as  $\delta x$  is small. Consistent with assumptions iv)-v) above, the sum over the microscopic densities can be considered to be fixed over  $N$  cells in Equation (14) within the small time interval  $[t, t + dt)$ .

On the right hand side of Equation (11), the first two terms involving  $f$  correspond to a mechanical contribution. This contribution is unchanged compared to Murphy et al. [27] and, when substituted into Equation (14), it gives rise to the mechanical relaxation term in the right hand side of continuum model Equation (3) (Supplementary Material S1.4). We now focus only on the contribution due to proliferation determined by substituting the proliferation terms of Equation (11) into Equation (14), giving a contribution which we denote  $\partial q(x, t)/\partial t|_P$ ,

$$\frac{\partial q(x, t)}{\partial t} \Big|_P = \frac{\partial}{\partial x} \left\langle \sum_{i=1}^N \delta(x - x_i^N(t)) \frac{1}{q_{i-1}^N(t)} \left[ \sum_{j=1}^{i-2} P\left(\frac{1}{q_j^N(t)}\right) + \frac{1}{2} P\left(\frac{1}{q_i^N(t)}\right) \right] \right\rangle_{\delta x}. \quad (15)$$

Now, assuming vii) that the spatial average interval is sufficiently far from the tissue boundary, i.e.  $i \gg 1$ , we make the following approximation:

$$\sum_{j=1}^{i-2} P\left(\frac{1}{q_j^N}\right) + \frac{1}{2} P\left(\frac{1}{q_i^N}\right) \approx \sum_{j=1}^{i-1} P\left(\frac{1}{q_j^N}\right). \quad (16)$$

To switch the dependence on the cell index to cell position, we multiply each term indexed by  $j$  in the sum on the right hand side of Equation (16) by  $1 = l_j q_j$ . Then, relating the discrete cell density to the continuous density through  $q_j^N = q(x_j^N(t), t)$ , gives

$$\sum_{j=1}^{i-1} q(x_j^N(t), t) P\left(\frac{1}{q(x_j^N(t), t)}\right) l_j. \quad (17)$$

We discretise the spatial domain  $x_1 \leq x \leq x_{i-1}$  with a uniform mesh with nodes  $y_s, s = 1, 2, \dots, S$ , where  $y_1 = x_1$ ,  $y_S = x_{i-1}$ , and  $y_s - y_{s-1} = \Delta y \ll l_j$ . Then, evaluating the continuous density at each node position,  $y_s$ , we interpret Equation (17) as the following Riemann sum

$$\sum_{s=1}^S q(y_s, t) P\left(\frac{1}{q(y_s, t)}\right) \Delta y = \int_0^{x_i^N} q(y, t) P\left(\frac{1}{q(y, t)}\right) dy, \quad (18)$$

where the integral on the right hand side is obtained by taking the limit  $\Delta y \rightarrow 0$ . Substituting Equation (18) into Equation (15) gives

$$\frac{\partial q(x, t)}{\partial t} \Big|_P = \frac{\partial}{\partial x} \left\langle \sum_{i=1}^N \delta(x - x_i^N(t)) \left(\frac{1}{q_{i-1}^N}\right) \left[ \int_0^{x_i^N} q(y, t) P\left(\frac{1}{q(y, t)}\right) dy \right] \right\rangle_{\delta x}. \quad (19)$$

Calculating the spatial average, which only includes contributions from within the spatial average interval due to the Dirac delta functions, gives

$$\frac{\partial q(x, t)}{\partial t} \Big|_P = \frac{\partial}{\partial x} \left( \left(\frac{n}{2\delta x}\right) \frac{1}{n} \sum_{r=1}^n \left(\frac{1}{q_{r-1}^N}\right) \left[ \int_0^{x_r^N} q(y, t) P\left(\frac{1}{q(y, t)}\right) dy \right] \right), \quad (20)$$

where the index  $r$  labels the  $n$  cell boundaries contained within the spatial average interval  $(x - \delta x, x + \delta x)$ . Since  $a_i \ll \delta x \ll L$  and  $n \gg 1$  we have  $q_r^N = q(x_r^N(t), t) \approx q(x, t)$  for all  $r$ , which is now independent of  $r$ . Similarly,  $x_r^N \approx x$  for all  $r$ , where  $x$  is the centre of the spatial average interval. This gives

$$\left. \frac{\partial q(x, t)}{\partial t} \right|_P = \frac{\partial}{\partial x} \left( \left( \frac{n}{2\delta x} \right) \frac{1}{q(x, t)} \int_0^x q(y, t) P \left( \frac{1}{q(y, t)} \right) dy \right). \quad (21)$$

As  $n/(2\delta x) = q(x, t)$  in this spatial average interval, Equation (21) simplifies to

$$\left. \frac{\partial q(x, t)}{\partial t} \right|_P = q(x, t) P \left( \frac{1}{q(x, t)} \right). \quad (22)$$

At this point, we see that all explicit references to the total number of cells,  $N(t)$ , vanish. This allows the validity of the derivation, initially restricted to the time interval  $[t, t + dt)$ , to be extended to arbitrary times. As  $N(t) = \int_0^L q(x, t) dx$ , the change in the total cell number with time due to proliferation is accounted for through the source term written in Equation (22). We also stated assumption vii) that held true when sufficiently far from the tissue boundary but we find that this works at the boundary also (Sections 3.1, 3.2). Equation (22) shows proliferation arises as a single source term consistent with usual continuum-based formulations of proliferation whereas in Baker et al. [2] proliferation arises as this term with an additional contribution.

### 2.2.2 Death

The derivation of the cell death sink term follows similarly to that of the cell proliferation source term. We again consider an infinitesimally small time interval  $[t, t + dt)$ , so that at most one cell death event can occur in  $[t, t + dt)$ , and condition on cell death events to understand all possible events that occur and influence cell boundary  $i$  at  $t + dt$ . This gives

$$\begin{aligned} x_i^N(t + dt) = & \left[ x_i^N(t) + \frac{dt}{\eta} \{ f^N(l_i^N) - f^N(l_{i-1}^N) \} \right] \times \mathbb{1} \{ \text{no proliferation} \} \\ & + \left[ x_i^{N+1}(t) + \frac{dt}{\eta} \{ f^{N+1}(l_i^{N+1}) - f^{N+1}(l_{i-1}^{N+1}) \} \right] \\ & \times \mathbb{1} \{ \text{death right of cell } i \} \\ & + \left[ x_{i+1}^{N+1}(t) + \frac{dt}{\eta} \{ f^{N+1}(l_{i+1}^{N+1}) - f^{N+1}(l_i^{N+1}) \} \right] \\ & \times \mathbb{1} \{ \text{death left of cell } i \} \\ & + \left[ \frac{x_i^{N+1}(t) + x_{i+1}^{N+1}(t)}{2} + \frac{dt}{2\eta} \{ f^{N+1}(l_{i+1}^{N+1}) - f^{N+1}(l_{i-1}^{N+1}) \} \right] \\ & \times \mathbb{1} \{ \text{death of cell } i \}. \end{aligned} \quad (23)$$

The cell death probabilities for Equation (23) for a system of  $N$  cells are given by

$$\mathbb{P}(\text{no death in } [t, t + dt)) = 1 - dt \sum_{j=1}^N D(l_j^N), \quad (24a)$$

$$\mathbb{P}(\text{death to the right of cell } i \text{ in } [t, t + dt)) = dt \sum_{j=i}^N D(l_j^N), \quad (24b)$$

$$\mathbb{P}(\text{death to the left of cell } i \text{ in } [t, t + dt)) = dt \sum_{j=1}^{i-2} D(l_j^N), \quad (24c)$$

$$\mathbb{P}(\text{death of cell } i \text{ in } [t, t + dt)) = dt D(l_i^N). \quad (24d)$$

Proceeding similarly to the proliferation derivation, we obtain

$$\begin{aligned} \frac{x_i^N(t + dt) - x_i^N(t)}{dt} &= \frac{1}{\eta} [f^N(l_i^N) - f^N(l_{i-1}^N)] \\ &- x_i^N(t) \sum_{j=1}^N D(l_j^N) + x_i^{N+1}(t) \sum_{j=i+1}^{N+1} D(l_j^{N+1}) \\ &+ x_{i+1}^{N+1}(t) \sum_{j=1}^{i-1} D(l_j^{N+1}) + \left( \frac{x_i^{N+1}(t) + x_{i+1}^{N+1}(t)}{2} \right) D(l_i^{N+1}) + \mathcal{O}(dt). \end{aligned} \quad (25)$$

Then, following the same approach as the proliferation derivation, we arrive at the sink term in Equation (3) for cell death,  $-q(x, t)D(1/q(x, t))$ .

### 2.2.3 Cell properties

Each cell is prescribed with intrinsic mechanical, proliferation, and death properties which are taken to be constant for each cell throughout the simulation. For mechanical cell properties, which include cell stiffness and resting cell length, we have the relationships  $\chi(x_i^N(t), t) = \chi_i$  for  $\chi = k, a$ . Similar relationships can be defined for the proliferation and death cell properties,  $\beta, \gamma, l_d$ . Differentiating these equations with respect to time we obtain Equations (5) [27].

### 3 Numerical results

In this section, we first explore the evolution of a homogeneous tissue with different proliferation and death mechanisms and then explore mechanical cell competition for a heterogeneous tissue.

#### 3.1 A homogeneous tissue

The simplest case to consider first is a homogeneous tissue composed of a population of identical cells. We explore three different proliferation and death mechanisms: constant, linear, and logistic (Table 1, Figure 2). For each mechanism we explore proliferation only, death only, and proliferation with death. Cell proliferation and death parameters (Figure 2) are chosen to observe homeostasis where the total cell number remains stable at approximately  $N(t) = 40$  for  $t > 0$ .

In all simulations we set  $L = 10$ , use a Gaussian initial density centred at  $x = L/2$  with variance three and scaled to have  $N(0) = 40$ . We set  $k = 10$ , so that mechanical relaxation is fast in comparison to the proliferation and death [2]. For individual realizations this results in uniform densities except for short-time transient behaviour following a cell proliferation or death event (Figures 3.1a-c, 3.1a-c, S3.2a-c). For simplicity and to represent that cells in an epithelial tissue are understood to be in extension [48], we set  $a = 0$  throughout this work.

For individual discrete realizations, cell proliferation causes a localised force imbalance followed by fast mechanical relaxation towards mechanical equilibrium and an overall increase in density (Figures 3.1a, 3.1a, S3.2a). Similarly, cell death results in a decrease in density followed by fast mechanical relaxation and an overall decrease in density (Figures 3.1b, 3.1b, S3.2b). With proliferation and death, cell boundaries are repeatedly introduced and removed, and the overall density remains, on average, constant (Figures 3.1c, 3.1c, S3.2c).

We observe excellent agreement when we compare the mean of many identically prepared discrete realizations and the corresponding solutions of the continuum model for both density snapshots and total cell number (Figures 3.1d-o, 3.1d-o, S3.2d-o).

We note that the continuum model does not always provide a good match with an individual realization of the discrete model. For example, for constant proliferation and constant death with equal rates, every discrete realization will eventually become extinct (Supplementary Material S3.1) as proliferation and death are independent of mechanical relaxation. This is expected as the total cell number is a linear birth-death process [40]. As a consequence, the standard deviation of the total cell number increases with time (Figures 3.1o). When cell proliferation and death are cell-length-dependent there is closer agreement between the continuum model and single realizations of the discrete model as extinction is extremely unlikely and the standard deviation of averaged discrete realizations is smaller (Figures 3.1o, S3.2o).

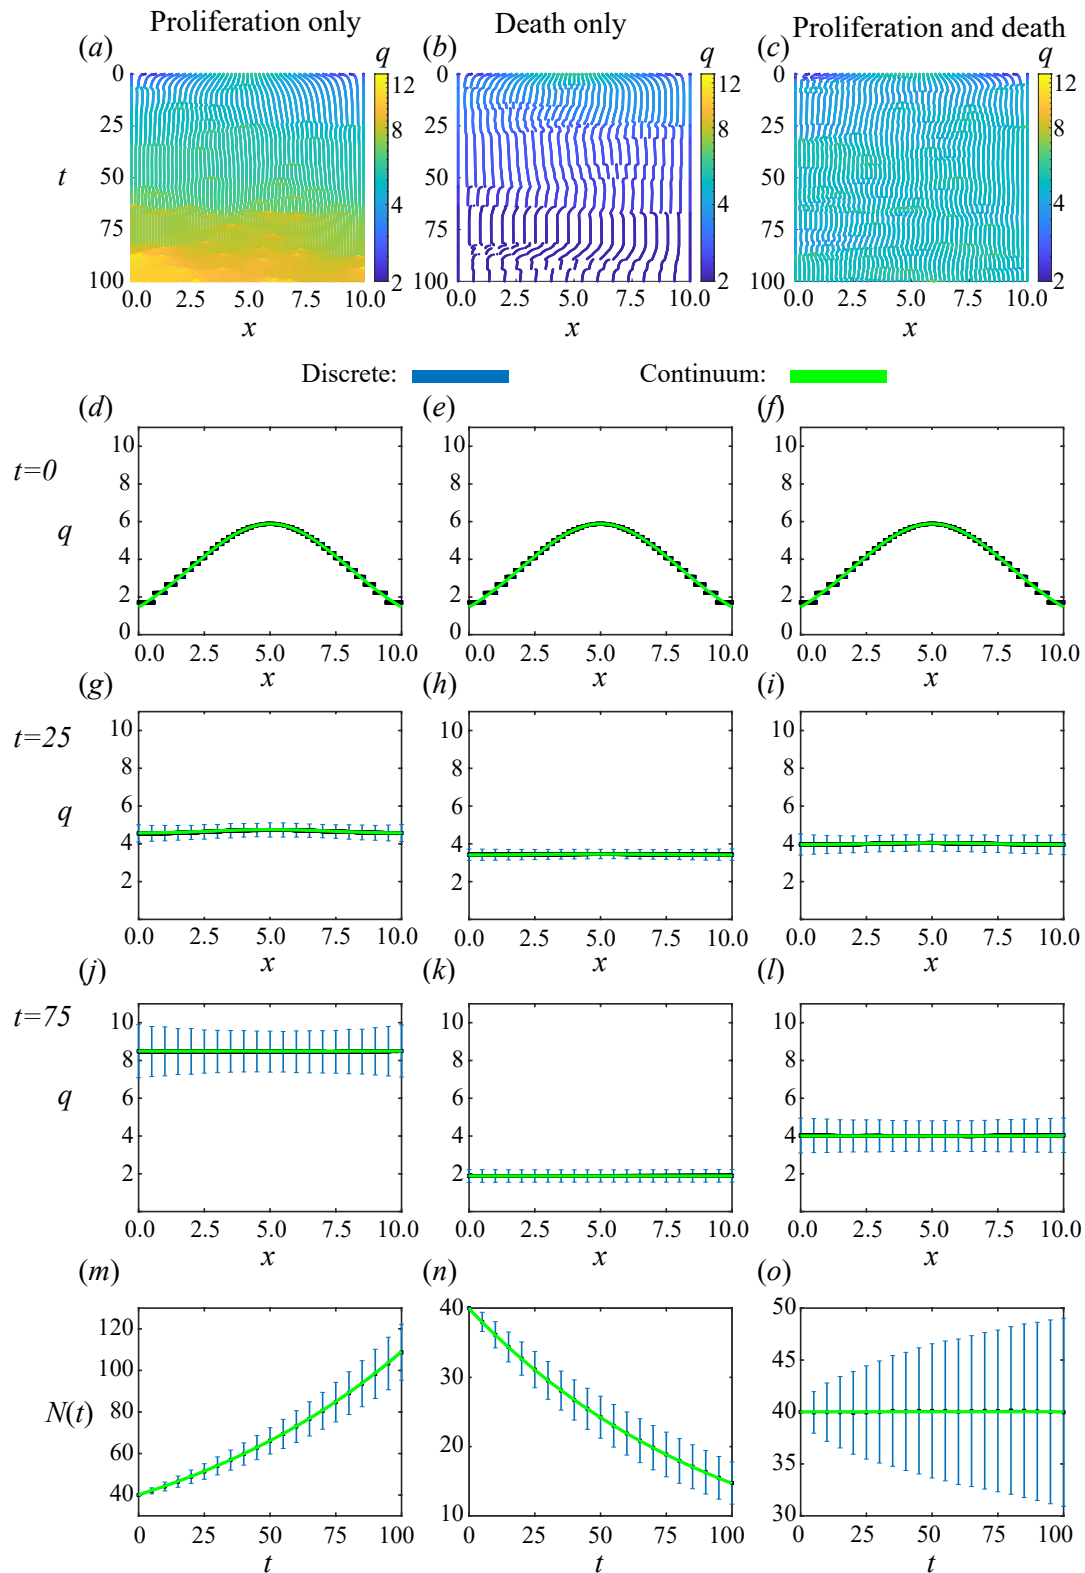

Figure 3: Homogeneous population with **constant** proliferation and death mechanisms. Proliferation only, death only, and proliferation with death shown in the left, middle and right columns, respectively. (a)-(c) Single realizations of cell boundary characteristics for  $0 \leq t \leq 100$ . (d)-(f), (g)-(i), (j)-(l) Density snapshots at times  $t = 0, 25, 75$ , respectively. (m)-(o) Total cell number. The average and standard deviation (blue error bars) of 2000 discrete simulations are compared to solution of continuum model (green).

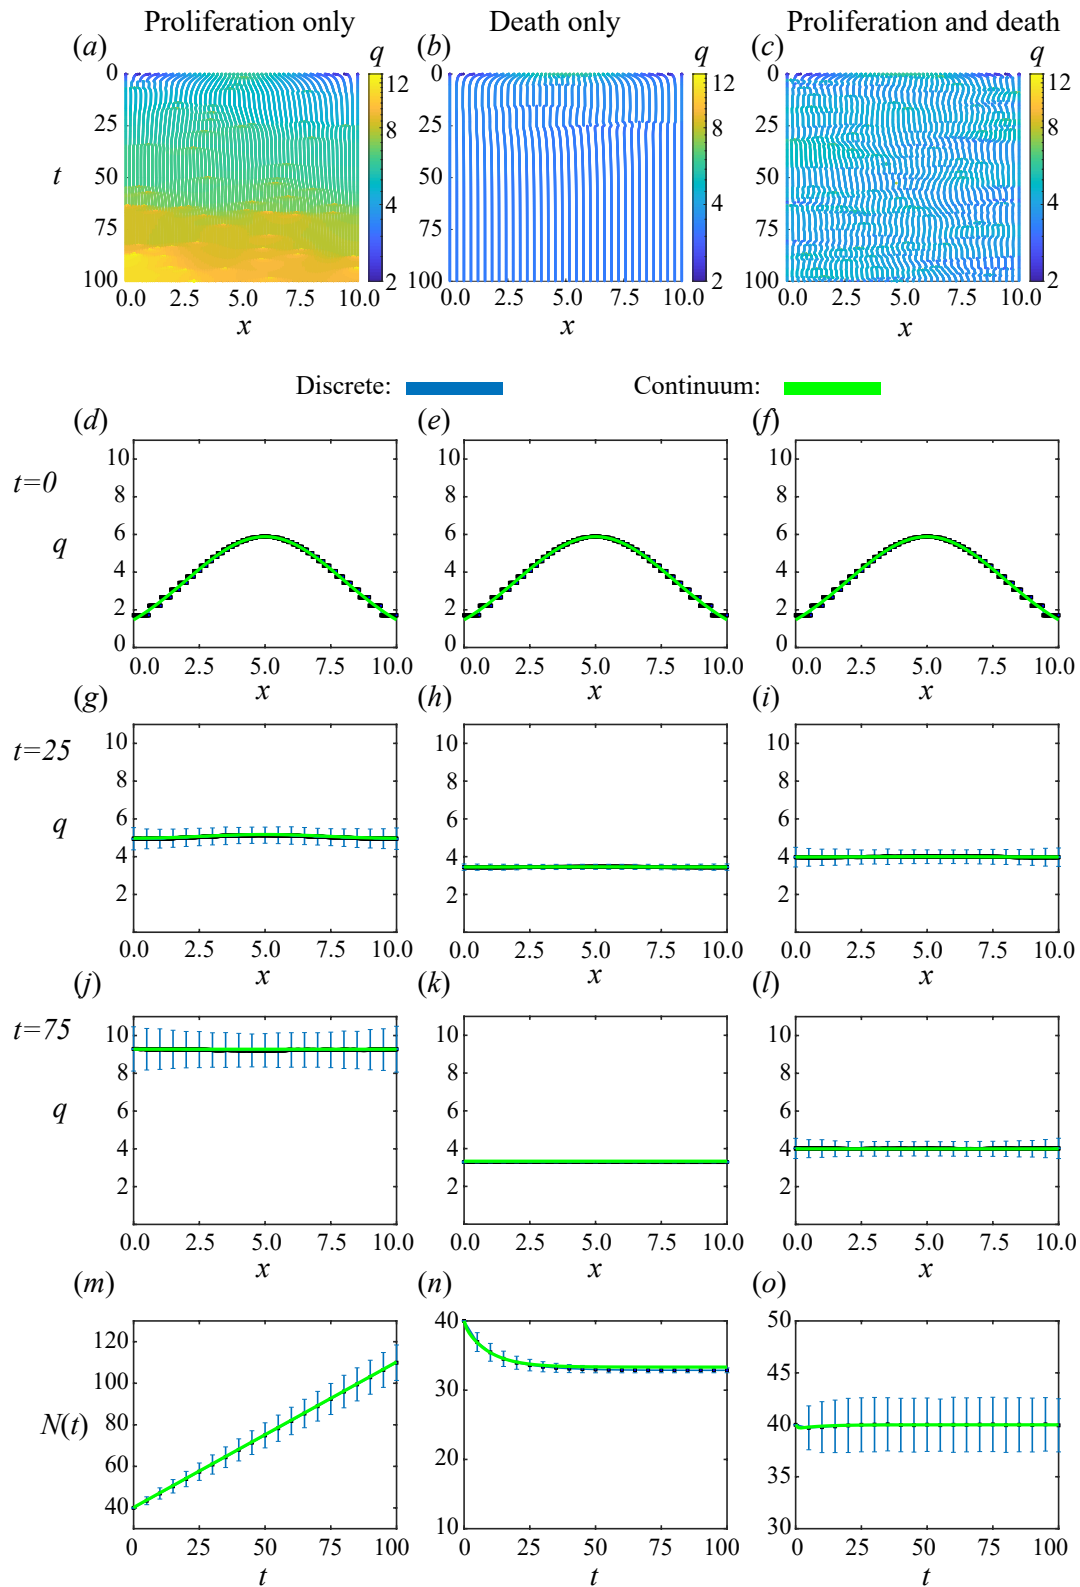

Figure 4: Homogeneous population with **linear** proliferation and death mechanisms. Proliferation only, death only, and proliferation with death shown in the left, middle and right columns, respectively. (a)-(c) Single realizations of cell boundary characteristics for  $0 \leq t \leq 100$ . (d)-(f), (g)-(i), (j)-(l) Density snapshots at times  $t = 0, 25, 75$ , respectively. (m)-(o) Total cell number. The average and standard deviation (blue error bars) of 2000 discrete simulations are compared to solution of continuum model (green).

### 3.2 Mechanical cell competition

How tissues compete with each other for space is of great interest with many open biological questions being pursued in the experimental cell biology literature [5, 21, 45]. For example, in cancer invasion in an epithelial tissue a key question is whether cancer cells will eventually replace the entire healthy tissue or can the cancer cells coexist with the healthy cells? We consider this question by simulating a heterogeneous tissue composed of two populations, cancer cells adjacent to healthy cells (Figure 1c). Biologically, it is a hallmark of cancer cells that they are more proliferative and resistant to death than healthy cells [15]. In existing models the standard procedure would be to include these hallmarks as modelling assumptions and not consider the role of mechanical relaxation. However, we will now show this assumption is not necessary. We find that mechanical differences are sufficient for these hallmarks to arise and for cancer cells to outcompete healthy cells. We prescribe cancer and healthy cells the same proliferation and death mechanisms and parameters. We ask a further key question, how does mechanical relaxation alone compare to mechanical relaxation with proliferation, and to mechanical relaxation with proliferation and death?

In all scenarios, the left tissue (tissue 1) is coloured red to represent cancer cells and the right tissue (tissue 2) is coloured blue to represent healthy cells (Figure 1c). Each tissue starts with 20 cells. We assume cancer cells have lower stiffness than healthy cells [20] so we set cells in tissue 1 and 2 with cell stiffnesses  $K_1 = 10$  and  $K_2 = 20$ , respectively. Again, we set  $a = 0$ .

With only mechanical relaxation the interface position,  $s(t)$ , relaxes to the long-time interface position,  $\mathcal{S} = \lim_{t \rightarrow \infty} s(t) = 6.66$  [27]. In this scenario, the cancer and healthy cells coexist. However, the assumption of mechanical relaxation alone is only realistic over a short timescale where proliferation and death are negligible. When we include proliferation and death below, we use this long-time solution as the initial condition. As the mechanical relaxation rate is faster than the proliferation and death rates, using this initial condition only neglects initial short-time transient behaviour and does not significantly impact the long-time solution.

For mechanical relaxation with proliferation (Figure 3.2), we prescribe the linear proliferation mechanism for both the cancer and healthy cells with the same parameters. As cancer cells have lower cell stiffness than healthy cells, the cancer cells are always longer than the healthy cells (Supplementary Material S4.1) except for the short transients after proliferation events where the cells have yet to mechanically relax. Initially, the cancer cells, with length  $1/3$ , are double the length of healthy cells. Referring to Figure 2b we see that the difference in cell lengths corresponds to cancer cells being more likely to proliferate than the healthy cells. Therefore, the cancer cells proliferate more than the healthy cells not because they were set to have advantageous intrinsic proliferation or death properties through a modelling assumption, but simply due to the coupling of mechanical relaxation with the length-dependent proliferation mechanism. With each proliferation event all cells become smaller, with the healthy cells remaining smaller than the cancer cells. Here we have coexistence but all cells will eventually become unrealistically small and this happens first for healthy cells.

In the absence of cell death, changing the proliferation mechanism will still result in coexistence.

For mechanical relaxation with proliferation and death (Figure 3.2) a cell is more likely to die when it is smaller (Figure 2b). As we have observed for mechanical relaxation with proliferation, the healthy cells are smaller first, due to their higher relative stiffness, and therefore are more likely to die first. Once all of the healthy cells have died we have a homogeneous population of cancerous cells (Section 3.1). Importantly, we find that the cancerous cells, despite having identical proliferation and death mechanisms, are the *winner* cells of mechanical cell competition; they outcompete the healthy cells and take over the domain purely as a result of having lower cell stiffness.

Similar results regarding cancer invasion are found when considering the logistic mechanisms with both proliferation and death (Supplementary Material S4.2). In contrast, for the constant proliferation and death mechanisms, where the proliferation and death mechanisms are both independent of the cell length and therefore independent of mechanical relaxation, to observe cancer cells invading the full domain we would have to prescribe the cancer cells to be more proliferative and resistant to death than the healthy cells.

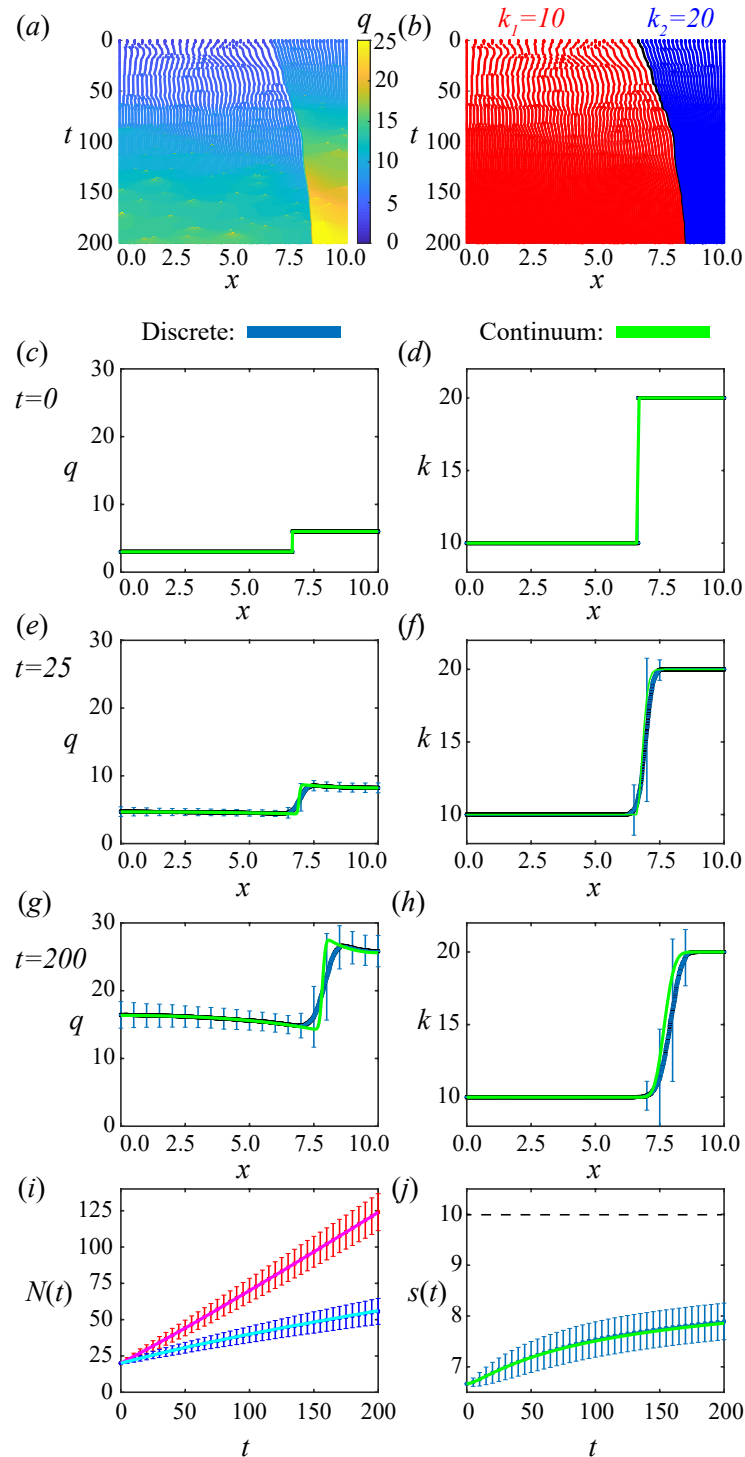

Figure 5: Results for cancer invasion with adjacent populations using **linear** proliferation and death mechanisms with **proliferation only**. (a),(b) A single realization of cell boundary characteristics for  $0 \leq t \leq 200$ . Colouring in (a),(b) represents cell density and cell stiffness, respectively. (c)-(d), (e)-(f), (g)-(h) Density and cell stiffness snapshots, left and right, respectively, at times  $t = 0, 25, 200$ , respectively. (i) Total cell number,  $N(t) > 0$ , for cancer (red/magenta) and healthy cells (blue/cyan) for the discrete/continuum solutions. (j) Interface position,  $s(t)$ , where the dotted line shows the edge of the domain. The average and standard deviation (blue error bar) of 2000 discrete simulations are compared to the solution of the continuum model (green).

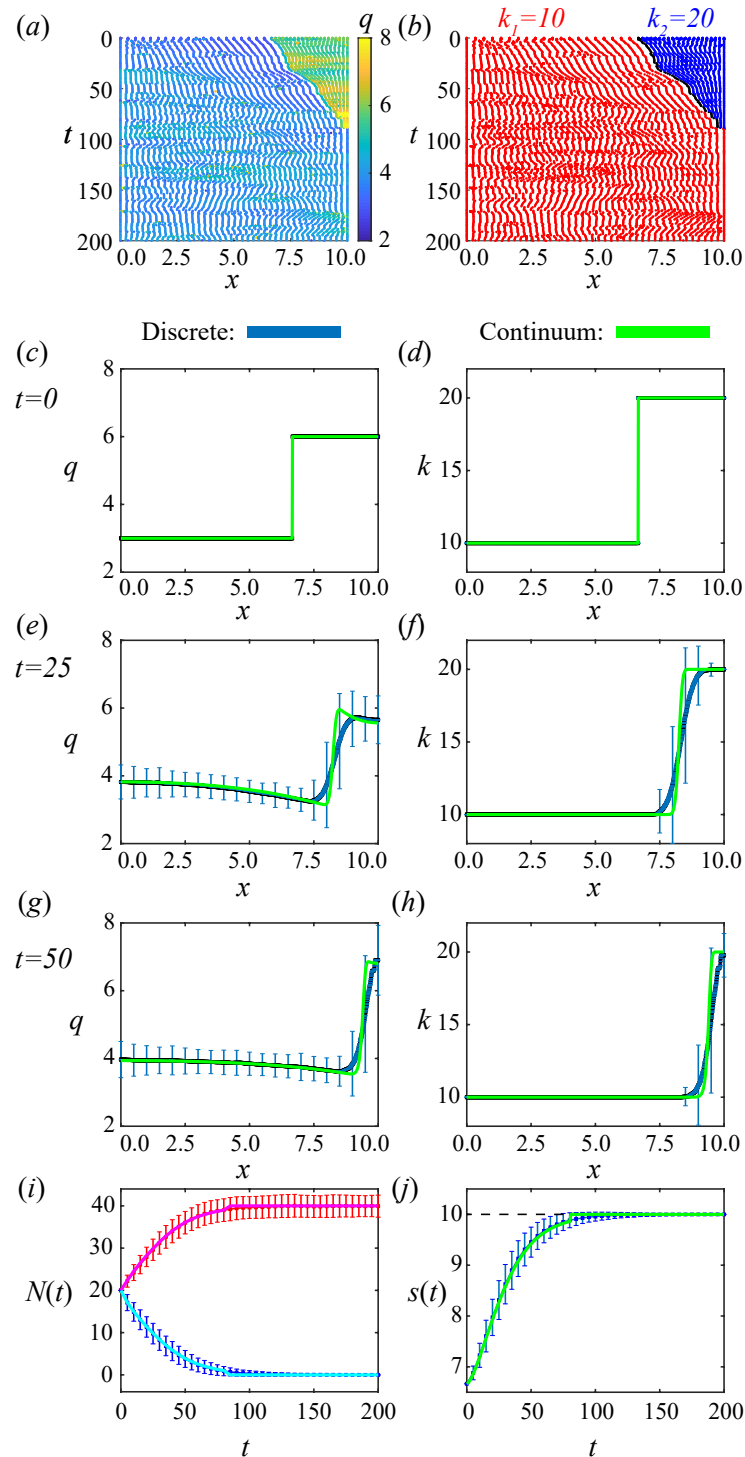

Figure 6: Results for cancer invasion with adjacent populations using **linear** proliferation and death mechanisms with **proliferation and death**. First row shows a single realization of cell boundary characteristics for  $0 \leq t \leq 200$ . Colouring in (a),(b) represent cell density and cell stiffness, respectively. (c)-(d), (e)-(f), (g)-(h) Density and cell stiffness snapshots, left and right, respectively, at times  $t = 0, 25, 50$ , respectively. (i) Total cell number,  $N(t) > 0$ , for cancer (red/magenta) and healthy cells (blue/cyan) for the discrete/continuum solutions. (j) Interface position,  $s(t)$ , where the dotted line shows the edge of the domain. The average and standard deviation (blue error bar) of 2000 discrete simulations are compared to the solution of the continuum model (green).

## 4 Conclusion

In this work, we present a new one-dimensional cell-based model of heterogeneous epithelial tissue mechanics that includes cell proliferation and death. The main focus is to determine the corresponding continuum model which is a novel coupled system of nonlinear partial differential equations. The cell density equation is a parabolic partial differential equation while the cell property equations are hyperbolic partial differential equations. In deriving the continuum model, the discrete mechanisms and assumptions that underpin the continuum model have been made explicit by presenting the details of the coarse-graining derivation. Assumptions that relate to mean-field approximations and statistical independence of quantities are normally implicitly assumed in continuum models. By specifying the details of the derivation, and all assumptions required, our work provides insight into situations when these assumptions hold, as well as giving insight into when these assumptions fail to hold, such as when the number of cells,  $N(t)$ , is not sufficiently large or when cell properties vary rapidly in space. Under these conditions we recommend that the discrete description is more appropriate than the approximate continuum description.

By coupling mechanics with proliferation and death we are able to explore biological scenarios that could not be described in previous modelling frameworks. Specifically we can focus on mechanical cell competition driven by variations in cell stiffness and resting cell length. By choosing mechanical relaxation rates sufficiently fast relative to proliferation rates we observe good agreement between the average of many identically prepared stochastic realizations of the discrete model and the corresponding solutions of the continuum model. This holds even when our simulations only consider 40 cells which is extremely small in comparison to the number of cells in an epithelial tissue. A continuum model is beneficial as we now have a tissue-level understanding of the mechanisms encoded in the discrete model and the time to solve the continuum model is independent of  $N(t)$ .

We explore mechanical cell competition applied to cancer invasion by considering cancer cells adjacent to healthy cells which compete for space. Interestingly, when we only allow cancer cells and healthy cells to differ in their cell stiffnesses, as a result of mechanical coupling, we observe that the cancer cells have more opportunities to proliferate and are less likely to die than healthy cells. We can then identify the cancer cells, as a result of the property of lower cell stiffness, as being the *winner* cells which invade the full domain. The influence of cell stiffness and cell size may therefore be an important factor to include when interpreting proliferation and death rates in experimental data. This analysis would not be possible using other existing models.

In all simulations we set  $a = 0$  to model cells being in extension [48]. Setting  $a > 0$  gives qualitatively very similar results for homogeneous populations and also for heterogeneous populations when cells remain in extension throughout the simulation. This modelling framework is well-suited to be extended to cases where cells may also become compressed, for example in a tumour spheroid [7].

Many interesting extensions to this work are possible. Mathematically, the extent to which the

continuum-limit holds with a free boundary is not yet clear. A free boundary also allows us to consider tissue growth [42] and shrinkage in mechanically less constrained environments, such as in developmental biology. Further, explicitly incorporating additional biological mechanisms that regulate cell size [16, 50, 51] and the evolution of intrinsic cell properties [14] would be both mathematically interesting and biologically relevant. The theoretical foundations presented here for building a discrete model and constructing the continuum limit of that discrete model could be used to describe these additional mechanisms in future analyses.

## Data Access

This article does not contain any additional data. Key algorithms used to generate results are available on <https://github.com/ryanmurphy42/Murphy2020a.git>.

## Author Contributions

All authors conceived and designed the study; R.J.M. performed numerical simulations and drafted the article; all authors provided comments and gave final approval for publication.

## Competing Interests

We have no competing interests.

## Funding

This work was funded by the Australian Research Council (DP170100474). R.E.B is a Royal Society Wolfson Research Merit Award holder, would like to thank the Leverhulme Trust for a Research Fellowship and also acknowledges the BBSRC for funding via grant no. BB/R000816/1.

## References

- [1] N. J. ARMSTRONG, K. J. PAINTER, AND J. A. SHERRATT, *A continuum approach to modelling cell-cell adhesion*, J. Theor. Biol., 243 (2005), pp. 98-113, <https://doi.org/10.1016/j.jtbi.2006.05.030>.
- [2] R. E. BAKER, A. PARKER, AND M. J. SIMPSON, *A free boundary model of epithelial dynamics*, J. Theor. Biol., 481 (2019), pp. 61-74, <https://doi.org/10.1016/j.jtbi.2018.12.025>.
- [3] M. BASAN, T. RISLER, J. JOANNY, X. SASTRE-GARAU, AND J. PROST, *Homeostatic competition drives tumor growth and metastasis nucleation*, HFSP J., 3 (2009), pp. 265-272, <https://doi.org/10.2976/1.3086732>.
- [4] M. BODNAR AND J. VELAZQUEZ, *Derivation of macroscopic equations for individual cell-based models: a formal approach*, Math. Method Appl. Sci., 28 (2005), pp. 1757-1779, <https://doi.org/10.1002/mma.638>.

- [5] C. BRAS-PEREIRA AND E. MORENO, *Mechanical cell competition*, Curr. Opin. Cell. Biol., 51 (2018), pp. 15-21, <https://doi.org/10.1016/j.ceb.2017.10.003>.
- [6] C. CADARD, L. VENKOVA, P. RECHO, M. C. LAGOMARSINO, AND M. PIEL, *The physics of cell-size regulation across timescales*, Nat. Phys., 15 (2019), pp. 993-1004, <https://doi.org/10.1038/s41567-019-0629-y>.
- [7] M. DELARUE, F. MONTEL, D. VIGNJEVIC, J. PROST, J. JOANNY, AND G. CAPPELLO, *Compressive stress inhibits proliferation in tumor spheroids through a volume limitation*, Biophys. J., 107 (2014), pp. 1821-1828, <https://doi.org/10.1016/j.bpj.2014.08.031>.
- [8] D. J. EVANS AND G. MORRIS, *Statistical Mechanics of Nonequilibrium Liquids*, Cambridge University Press, Cambridge, UK, 2008.
- [9] N. D. EVANS, R. O. C. OREFFO, E. HEALY, P. J. THURNER, AND Y. H. MAN, *Epithelial mechanobiology, skin wound healing, and the stem cell niche*, J. Mech. Behav. Biomed., 28 (2013), pp. 397-409, <https://doi.org/10.1016/j.jmbbm.2013.04.023>.
- [10] A. G. FLETCHER, F. COOPER, AND R. E. BAKER, *Mechanocellular models of epithelial morphogenesis*, Phil. Trans. R. Soc. B., 327 (2017), 20150519, <https://doi.org/10.1098/rstb.2015.0519>.
- [11] J. A. FOZARD, H. M. BYRNE, O. E. JENSEN, AND J. R. KING, *Continuum approximations of individual-based models for epithelial monolayers*, Math. Med. Biol., 27 (2010), pp. 39-74, <https://doi.org/10.1093/imammb/dqp015>.
- [12] S. A. H. GERITZ AND A. KISDI, *Mathematical ecology: why mechanistic models?*, J. Math. Biol., 65 (2012), pp. 1411-1415, <https://doi.org/10.1007/s00285-011-0496-3>.
- [13] S. A. GUDIPATY, J. LINDBLOM, P. D. LOFTUS, M. J. REDD, K. EDES, C. F. DAVEY, V. KRISHNEGOWDA, AND J. ROSENBLATT, *Mechanical stretch triggers rapid epithelial cell division through piezo1*, Nature, 543 (2017), pp. 118-121, <https://doi.org/10.1038/nature21407>.
- [14] Y. L. HAN, A. F. PEGORARO, H. LI, K. LI, Y. YUAN, G. XU, Z. GU, J. SUN, Y. HAO, S. K. GUPTA, Y. LI, W. TANG, H. KANG, L. TENG, J. J. FREDBERG, AND M. GUO, *Cell swelling, softening and invasion in a three-dimensional breast cancer model*, Nat. Phys., (2019), <https://doi.org/10.1038/s41567-019-0680-8>.
- [15] D. HANAHAN AND R. A. WEINBERG, *Hallmarks of cancer: the next generation*, Cell, 144 (2011), pp. 646-674, <https://doi.org/10.1016/j.cell.2011.02.013>.
- [16] W. R. HOLMES AND L. EDELSTEIN-KESHET, *Analysis of a minimal Rho-GTPase circuit regulating cell shape*, Phys. Biol., 13 (2016), 046001, <https://doi.org/10.1088/1478-3975/13/4/046001>.

- [17] S. T. JOHNSTON, M. J. SIMPSON, AND M. J. PLANK, *Lattice-free descriptions of collective motion with crowding and adhesion.*, Phys. Rev E, 88 (2013), 062720, <https://doi.org/10.1103/PhysRevE.88.062720>.
- [18] K. A. LANDMAN, M. J. SIMPSON, J. L. SLATER, AND D. F. NEWGREEN, *Diffusive and chemotactic cellular migration: smooth and discontinuous traveling wave solutions*, SIAM J. Appl. Math., 65 (2005), pp. 1420-1442, <https://doi.org/10.1137/040604066>.
- [19] S. LEE AND Y. MORISHITA, *Possible roles of mechanical cell elimination intrinsic to growing tissues from the perspective of tissue growth efficiency and homeostasis*, PLOS Comput. Biol., 13 (2017), e1005651, <https://doi.org/10.1371/journal.pcbi.1005651>.
- [20] M. LEKKA, *Discrimination between normal and cancerous cells using AFM*, BioNanoSci, 6 (2016), pp. 65-80, <https://doi.org/10.1007/s12668-016-0191-3>.
- [21] R. LEVAYER, *Solid stress, competition for space and cancer: The opposing roles of mechanical cell competition in tumour initiation and growth*, Semin. Cancer Biol., (2019), <https://doi.org/10.1016/j.semcancer.2019.05.004>.
- [22] M. J. LIGHTHILL, *An Introduction to Fourier Analysis and Generalised Functions*, Cambridge University Press, Cambridge, UK, 1958.
- [23] T. LORENZI, P. MURRAY, AND M. PTASHNYK, *From individual-based mechanical models of multicellular systems to free-boundary problems*, Preprint on arXiv, (2019), <https://arxiv.org/abs/arXiv:1903.06590>.
- [24] T. J. M., G. CHENG, J. A. TYRRELL, S. A. WILCOX-ADELMAN, Y. BOUCHER, R. K. JAIN, AND L. L. MINN, *Mechanical compression drives cancer cells toward invasive phenotype*, P. Natl. Acad. Sci. USA, 109 (2011), pp. 911-916, <https://doi.org/10.1073/pnas.1118910109>.
- [25] A. MATAMORO-VIDAL AND R. LEVAYER, *Multiple influences of mechanical forces on cell competition*, Curr. Biol., 29 (2019), R762-R774, <https://doi.org/10.1016/j.cub.2019.06.030>.
- [26] O. M. MATSIKA, C. J. PENINGTON, R. E. BAKER, AND M. J. SIMPSON, *Discrete and continuum approximations for collective cell migration in a scratch assay with cell size dynamics*, B. Math. Biol., 80 (2018), pp. 738-757, <https://doi.org/10.1007/s11538-018-0398-2>.
- [27] R. J. MURPHY, P. R. BUENZLI, R. E. BAKER, AND M. J. SIMPSON, *A one-dimensional individual-based mechanical model of cell movement in heterogeneous tissues and its coarse-grained approximation*, Proc. R. Soc. A, 475 (2019), 20180838, <https://doi.org/10.1098/rspa.2018.0838>.
- [28] P. J. MURRAY, C. M. EDWARDS, M. J. TINDALL, AND P. K. MAINI, *From a discrete to a continuum model of cell dynamics in one dimension*, Phys. Rev. E, 80 (2009), 031912, <https://doi.org/10.1103/PhysRevE.80.031912>.

- [29] P. J. MURRAY, C. M. EDWARDS, M. J. TINDALL, AND P. K. MAINI, *Classifying general nonlinear force laws in cell-based models via the continuum limit*, Phys. Rev. E, 85 (2012), 021921, <https://doi.org/10.1103/PhysRevE.85.021921>.
- [30] P. J. MURRAY, J. KANG, G. R. MIRAMS, S.-Y. SHIN, H. M. BYRNE, P. K. MAINI, AND K. H. CHO, *Modelling spatially regulated  $\beta$ -catenin dynamics and invasion in intestinal crypts*, Biophys. J., 99 (2010), pp. 716-725, <https://doi.org/10.1016/j.bpj.2010.05.016>.
- [31] P. J. MURRAY, A. WALTER, A. G. FLETCHER, C. M. EDWARDS, M. J. TINDALL, AND P. K. MAINI, *Comparing a discrete and continuum model of the intestinal crypt*, Phys. Biol., 8 (2011), 026011, <https://doi.org/10.1088/1478-3975/8/2/026011>.
- [32] R. D. O'DEA AND J. R. KING, *Continuum limits of pattern formation in hexagonal-cell monolayers*, J. Math. Biol., 64 (2012), pp. 579-610, <https://doi.org/10.1007/s00285-011-0427-3>.
- [33] J. M. OSBORNE, A. G. FLETCHER, J. M. PITT-FRANCIS, P. K. MAINI, AND D. J. GAVAGHAN, *Comparing individual-based approaches to modelling the self-organization of multicellular tissues*, PLoS Comput. Biol., 13 (2017), e1005387, <https://doi.org/10.1371/journal.pcbi.1005387>.
- [34] P. PATHMANATHAN, J. COOPER, A. G. FLETCHER, G. MIRAMS, P. J. MURRAY, J. M. OSBORNE, J. PITT-FRANCIS, A. WALTER, AND S. J. CHAPMAN, *A computational study of discrete mechanical tissue models*, Phys. Biol., 6 (2009), 036001, <https://doi.org/10.1088/1478-3975/6/3/036001>.
- [35] R. PENTA, D. AMBROSI, AND R. J. SHIPLEY, *Effective governing equations for poroelastic growing media*, Q. J. Mech. Appl. Math., 67 (2014), pp. 69-91, <https://doi.org/10.1093/qjmam/hbt024>.
- [36] M. PLODINEC, M. LOPARIC, C. MONNIER, E. OBERMANN, R. ZANETTI-DALLENBACH, P. OERTLE, J. HYOTYLA, U. AEBI, M. BENTIREN-ALJ, R. LIM, AND C. SCHOENBERGER, *The nanomechanical signature of breast cancer*, Nat. Nanotechnol., 7 (2012), pp. 757-764, <https://doi.org/10.1038/nnano.2012.167>.
- [37] K. POWELL, *These secret battles between your body's cells might just save your life*, Nature, 574 (2019), pp. 310-312, <https://doi.org/10.1038/d41586-019-03060-y>.
- [38] A. PULIAFITO, L. HUFNAGEL, P. NEVEU, S. STREICHAN, A. SIGAL, D. KUCHNIR FYGENSEN, AND B. I. SHRAIMAN, *Collective and single cell behavior in epithelial contact inhibition*, P. Natl. Acad. Sci. USA, 109 (2012), pp. 739-744, <https://doi.org/10.1073/pnas.1007809109>.
- [39] P. RECHO, J. RANFT, AND P. MARCQ, *One-dimensional collective migration of a proliferating cell monolayer*, Soft Matter, 8 (2016), pp. 2381-2391, <https://doi.org/10.1039/C5SM02857D>.

- [40] S. M. ROSS, *Stochastic Processes*, Wiley, New York, NY, 2nd ed., 1996.
- [41] M. S. SAMUEL, J. LOPEZ, E. MCGHEE, D. CROFT, D. STRACHAN, P. TIMPSON, J. MUNRO, E. SCHRÖDER, J. ZHOU, V. BRUNTON, N. BAKER, H. CLEVERS, O. SANSOM, K. ANDERSON, V. WEAVER, AND M. OLSON, *Actomyosin-mediated cellular tension drives increased tissue stiffness and  $\beta$ -catenin activation to induce epidermal hyperplasia and tumor growth*, *Cancer cell*, 19 (2011), pp. 776-791, <https://doi.org/10.1016/j.ccr.2011.05.008>.
- [42] X. SERRA-PICAMAL, V. CONTE, R. VINCENT, E. ANON, D. T. TAMBE, E. BAZELLIERES, J. P. BUTLER, J. J. FREDBERG, AND X. TREPAT, *Mechanical waves during tissue expansion*, *Nat. Phys.*, 8 (2012), pp. 628-634, <https://doi.org/10.1038/nphys2355>.
- [43] B. I. SHRAIMAN, *Mechanical feedback as a possible regulator of tissue growth*, *P. Natl. Acad. Sci. USA*, 102 (2005), pp. 3318-3323, <https://doi.org/10.1073/pnas.0404782102>.
- [44] X. TREPAT AND E. SAHAI, *Mesoscale physical principles of collective cell organisation*, *Nat. Phys.*, 14 (2018), pp. 671-682, <https://doi.org/10.1038/s41567-018-0194-9>.
- [45] A. TSUBOI, S. OHSAWA, D. UMETSU, Y. SANDO, E. KURANAGA, T. IGAKI, AND K. FUJIMOTO, *Competition for space is controlled by apoptosis-induced change of local epithelial topology*, *Curr. Biol.*, 28 (2018), pp. 2115-2128, <https://doi.org/10.1016/j.cub.2018.05.029>.
- [46] P. VAN MEURS AND M. MARONDOTTI, *Discrete-to-continuum limits of particles with an annihilation rule*, *SIAM J. Appl. Math.*, 79 (2019), pp. 1940-1966, <https://doi.org/10.1137/18M1236058>.
- [47] L. WAGSTAFF, M. GOSCHORKSA, K. KOZYRSKA, G. DUCLOS, I. KUCINSKI, A. CHESSEL, L. HAMPTON-O'NEIL, C. R. BRADSHAW, G. E. ALLEN, E. L. RAWLINS, P. SILBERZAN, R. E. CARAZO-SALAS, AND E. PIDDINI, *Mechanical cell competition kills cells via induction of lethal p53 levels*, *Nat. Commun.*, 7 (2016), 11373, <https://doi.org/10.1038/ncomms11373>.
- [48] T. WYATT, B. BAUM, AND G. CHARRAS, *A question of time: tissue adaptation to mechanical forces*, *Curr. Opin. Cell Biol.*, 38 (2016), pp. 68-73, <https://doi.org/10.1016/j.ceb.2016.02.012>.
- [49] M. A. YERENIUK AND S. D. OLSON, *Global density analysis for an off-lattice agent-based model*, *SIAM J. Appl. Math.*, 79 (2019), pp. 1700-1721, <https://doi.org/10.1137/18M1186939>.
- [50] C. ZMURCHOK, D. BHASKAR, AND L. EDELSTEIN-KESHET, *Coupling mechanical tension and GTPase signaling to generate cell and tissue dynamics*, *Phys. Biol.*, 15 (2018), 046004, <https://doi.org/10.1088/1478-3975/aab1c0>.
- [51] C. ZMURCHOK AND W. R. HOLMES, *Modeling cell shape diversity arising from complex Rho GTPase dynamics*, Preprint on bioRxiv, (2019), <https://doi.org/10.1101/561373>.
